# Supplementary material
Source: ML conference proceedings conference paper supplement (https://aclanthology.org/2022.aacl-main.55)
Supplement: Dataset [file 2022.aacl-main.55.Dataset.doc]

All data resources to replicate results can be found at: www.https://github.com/google-research-datasets/nlp-fairness-for-india
